# Supplementary material for: Active maintenance of eligibility trace in rodent prefrontal cortex
Source: PubMed Central journal article supplement (PMC7608665; doi:10.1038/s41598-020-75820-0), 2020-11-02
Supplement: 41598_2020_75820_MOESM1_ESM.pdf [file 41598_2020_75820_MOESM1_ESM.pdf]

## Supplementary Information

Active maintenance of eligibility trace in rodent prefrontal cortex

Dong-Hyun Lim, Young Ju Yoon, Eunsil Her, Suehee Huh & Min Whan Jung

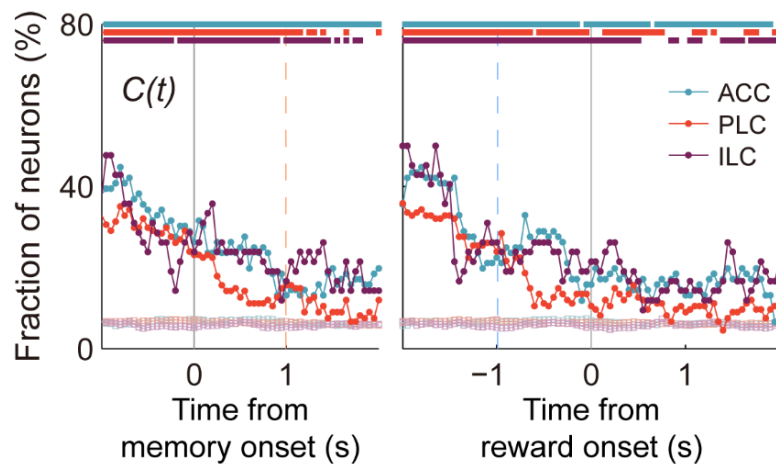

**Figure S1. Choice-related neural activity excluding sessions with different return times.** Population data showing temporal profiles of choice signals during the memory and reward stages. Only those sessions without significantly ( $t$ -test,  $p < 0.05$ ) different return times between high and low reward-probability-target choices ( $n = 32$  out of 41 sessions;  $n = 76$  ACC, 134 PLC, and 42 ILC units) were included in the analysis. The same format as in Fig. 3b.
